# Supplementary material for: Ethylene Signal Is Involved in the Regulation of Anthocyanin Accumulation in Flesh of Postharvest Plums (Prunus salicina Lindl.)
Source: MDPI journal article supplement (doi:10.3390/plants12040893), 2023-02-16
Supplement: s1 [file s1]

**Table S2** The sequence of primers of for qRT-PCR.

| Gene               | Accession no.  | Forward                   | Reverse                  |
|--------------------|----------------|---------------------------|--------------------------|
| <i>PsACT</i>       | XM_008234719.2 | CTGGACCTTGCTGGTCGT        | ATTTCCCGCTCAGCAGTG       |
| <i>PsPAL</i>       | XM_008245733.2 | AATGCAAGCACTTCAATCTTC     | GAATCCAGCACTTCCACTATCC   |
| <i>PsCHS</i>       | XM_008226357.2 | AGAGTCCAAATTAGCCCTGAAGC   | AATAAATAGCACACAGGCACTGG  |
| <i>PsDFR</i>       | XM_007222255.2 | GCCAACAATAAATGGGGTGC      | ATTCACGGTTCCTGCTGAGG     |
| <i>PsF3H</i>       | XM_007202045.2 | GCACAATTACCCTTTTGCTCC     | CCCATTGCTCAGAAAATGACC    |
| <i>PsANS</i>       | XM_007210458.2 | ATTTGGCCTCAAACACCTGC      | ATCCCAACCCAAGTGACAGC     |
| <i>PsUFGT</i>      | XM_021949698.1 | ATGTCGGACCTTTCAACCTAGC    | AGGACAGGCAACCAGTAACGTC   |
| <i>PsWIN1</i>      | XM_007216691.2 | ACCCCAGCCAGAACTAGCA       | TGCAACCCCTTCCTCGTCAT     |
| <i>PsMYB10</i>     | Pd.00g623010   | AATAAGACCTCAACCCGAAGC     | TCCCCACCAATCCTTTCCGTTT   |
| <i>PsACS1</i>      | Pd.00g1111090  | ATTCATCAACCAAAAGAACATCC   | CAATTCATGTTTTGTATGACCTCG |
| <i>PsACS4</i>      | Pd.00g1126480  | GATCATAACAAACCCATCAAACC   | TGCATAGATTTCTGTCACACACC  |
| <i>PsACO1</i>      | Pd.00g1254750  | GCAGAGGTTCAAGGAGCTGG      | GCGCAAGTAGAAGGTGCTTT     |
| <i>PsERS1</i>      | Pd.00g069100   | CCCCTATTAAATCTTTCGAATTTCC | CTGATCTGCAACAACATCAACC   |
| <i>PsETR1</i>      | Pd.00g189180   | GAATTGATGGTTACGAACCTGCTG  | TCCATCCATAACCAACCCTCATG  |
| <i>PsETR2</i>      | Pd.00g791340   | AAATGATGTGATGGATAATTCTGC  | GCCCTTGTTACACACACAAGC    |
| <i>PsCTR1</i>      | Pd.00g887430   | GAATACTACGCTCCGACTCTATCG  | TTCACCACCTCCACCAACC      |
| <i>PsEIN2</i>      | Pd.00g027930   | CCCAGCCAGCCACAATACAT      | CACCCAATGAAGAAGCGGA      |
| <i>PsEIN3/EIL1</i> | Pd.00g550550   | GCAGCTCCAGAGCATGACC       | CTTTAAGTCGCTTCAATAGCATCC |
| <i>PsERF1a</i>     | Pd.00g424390   | CTGACGCGGATATCACACTCC     | GAGAAAATCGGACCCGTAACC    |
| <i>PsERF11</i>     | Pd.00g241640   | CCAGAGACGGGAGCAACAAT      | GGAACCTAACACCCTGAGCGAGA  |
| <i>PsERF12</i>     | Pd.00g861270   | GCGACTGCTTCTTCATCTCG      | ACCAAACCCTGGTCTTCTTCC    |
