# Supplementary material for: Ethylene Signal Is Involved in the Regulation of Anthocyanin Accumulation in Flesh of Postharvest Plums (Prunus salicina Lindl.)
Source: MDPI journal article supplement (doi:10.3390/plants12040893), 2023-02-16
Supplement: s1 [file s1]

**Table S1** Alignment of homologous genes selected from the transcriptome data

| Gene             | Number | Identity |
|------------------|--------|----------|
| <i>ACS4</i>      | 5      | 97.88%   |
| <i>ACO1</i>      | 4      | 97.12%   |
| <i>ERS</i>       | 5      | 91.79%   |
| <i>ETR1</i>      | 3      | 98.53%   |
| <i>ETR2</i>      | 3      | 97.53%   |
| <i>EIN4</i>      | 4      | 72.72%   |
| <i>CTR1</i>      | 6      | 56.11%   |
| <i>EIN3/EIL1</i> | 11     | 76.75%   |
| <i>ERF1a</i>     | 4      | 89.84%   |
| <i>ERF12</i>     | 3      | 99.29%   |
